# Supplementary material
Source: PubMed Central journal article supplement (PMC3705934)
Supplement: NIHMS477993-supplement-SOP1.pdf [file NIHMS477993-supplement-SOP1.pdf]

## SOP: D03.01.23 GENERATION OF EBV-TRANSFORMED CELL LINES (LYMPHOBLASTOID CELL LINES - LCL)

*If using a printed copy, insert print date here: \_\_\_\_\_ (on first page only)*

- 
- |         |                                                                          |                                 |
|---------|--------------------------------------------------------------------------|---------------------------------|
| 4.2.3.  | Fetal Calf Serum (Heat inactivated)                                      | HyClone                         |
| 4.2.4.  | L-glutamine (200 Mm)                                                     | Invitrogen                      |
| 4.2.5.  | EBV-containing Viral Supernatant                                         | Produced by cell line B95-8     |
| 4.2.6.  | Cyclosporin A                                                            | Sandoz                          |
| 4.2.7.  | Acyclovir                                                                | Wellcome                        |
| 4.2.8.  | Freezing medium                                                          | Origen (Fisher Cat.#1G-50-0715) |
|         | 4.2.8.1. (10%DMSO, 10% HI FBS,80% Iscove's Dulbecco's Medium)            |                                 |
| 4.2.9.  | Centrifuge tubes                                                         | Corning                         |
| 4.2.10. | Tissue culture plates                                                    | Costar                          |
| 4.2.11. | Disposable pipets                                                        | Costar                          |
| 4.2.12. | Tissue culture flasks - vented                                           | Costar                          |
| 4.2.13. | Ficoll                                                                   | Pharmacia                       |
| 4.3.    | Equipment                                                                |                                 |
|         | 4.3.1. Biological safety cabinet, certified                              |                                 |
|         | 4.3.2. Centrifuge, calibrated                                            |                                 |
|         | 4.3.3. Humidified incubator with atmosphere of 5% CO <sub>2</sub> in air |                                 |
|         | 4.3.4. Hemacytometer                                                     |                                 |

### 5. Procedure:

**NOTE: Perform all steps in a certified biological safety cabinet, using aseptic technique and following Universal Precautions for handling blood and blood products.**

- 5.1. *Generation of EBV-transformed B cell lines from patients or donors*
  - 5.1.1. (Use worksheet DW3.1.xA)
  - 5.1.2. Prepare 5 ml of culture medium containing 1ug/ml Cyclosporin A for later use
  - 5.1.3. Separate mononuclear cells from a minimum of 5 ml of peripheral blood as described in the SOP "Density Gradient Separation of Lymphocytes Using Ficoll ®"

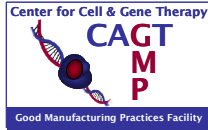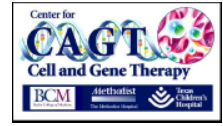

## SOP: D03.01.23 GENERATION OF EBV-TRANSFORMED CELL LINES (LYMPHOBLASTOID CELL LINES - LCL)

*If using a printed copy, insert print date here: \_\_\_\_\_ (on first page only)*

- 
- 5.1.4. Save 1 ml of plasma in a cryovial and store at  $-80^{\circ}\text{C}$  if required.
  - 5.1.5. Centrifuge  $5 \times 10^6$  PBMC for 5' @ 400 g. Remove supernatant and resuspend pellet.
  - 5.1.6. Add 200ul of concentrated B95-8 virus supernatant to PBMC. Resuspend the cells by gently flicking the base of the tube with the fingers.
  - 5.1.7. Add 1.8 ml of complete culture medium containing 1ug/ml Cyclosporin A.
  - 5.1.8. Place 200ul of cell mixture in each of 5 wells of a 96-well flat-bottomed plate. Place 100ul of cell mixture into another 10 wells of the same 96 well flat bottom plate. Add an additional 100ul of CSA-containing medium to the 10 wells containing 100ul of cell suspension. The final volume per well is 200ul.
  - 5.1.9. Fill empty wells with sterile water.
  - 5.1.10. Place plate(s) in  $37^{\circ}\text{C}$ , 5%  $\text{CO}_2$  incubator.
  - 5.1.11. Remaining PBMC should be frozen in aliquots of  $\sim 5 \times 10^6/\text{ml}$  as backup as described in section 5.3

**NOTE: For patients with allogeneic donors, peripheral blood should be requested at this time to initiate PHA blasts according to SOP D.3.6**

- 5.1.12. Feed plate weekly as follows:
  - 5.1.12.1. Remove plate(s) from incubator and aspirate  $\sim 0.1$  ml of medium from each well of the 96-well flat-bottom plate.
  - 5.1.12.2. Add  $\sim 0.1$ ml of fresh medium to each well and return to incubator.
- 5.1.13. After 2-3 weeks of incubation, if transformed cell clumps are expanding, combine cells from three wells of the 96-well plate into one well of a 24-well flat-bottomed plate. Retain remaining cells in 96-well plate as reserves and feed harvested wells with medium, as these usually grow back. (Worksheet DW03.01.xb)
- 5.1.14. Continue with weekly feeds and expansion of the 96 well plate. Begin twice weekly feeds of 24 well plates.
- 5.1.15. Once cells are clearly proliferating, according to microscopic examination, remove cells from 24-well plate and place them into a  $25 \text{ cm}^2$  vented flask with 5ml

## SOP: D03.01.23 GENERATION OF EBV-TRANSFORMED CELL LINES (LYMPHOBLASTOID CELL LINES - LCL)

*If using a printed copy, insert print date here: \_\_\_\_\_ (on first page only)*

---

complete medium plus 100 $\mu$ M of Acyclovir. Acyclovir is added to assure that there will be no infectious virus present in the culture. At this time, also add acyclovir to 2 mL wells to keep all cells synchronized for acyclovir

5.1.16. Feed cells twice weekly with complete medium, adding 100 $\mu$ M Acyclovir each time. After approximately two weeks, freeze 3 vials with at least  $5 \times 10^6$  LCLs as described below. (Form DW3.1.1d) The residual cells are for cytotoxic T lymphocyte (CTL) generation.

5.1.17. LCLs should be cultured to appropriate cell numbers for CTL stimulation and maintained in culture as stimulator cells for CTLs. (Form DW3.1.1c)

### 5.2. *Expansion of LCLs in bioreactors (G40 and G500)*

**NOTE: If large numbers of LCLs are required or if LCLs are growing poorly, they may be expanded in bioreactors, in which cells grow to higher cell densities and are less susceptible to oxygen deprivation.**

5.2.1. Once LCLs are established, transfer  $1 \times 10^6$  into a GP40 bioreactor. Add LCL medium to 30 mLs. Culture for ~ 7 days in 37 $^{\circ}$  C/5% CO<sub>2</sub> incubator.

5.2.2. On day 7, count. Expect ~  $5 \times 10^7$  LCLs.

5.2.2.1. If fewer than  $5 \times 10^7$ , cells may be cultured for 2-3 more days

5.2.3. Cells may be removed for irradiation and use as APCs, transduction with adenovirus vectors or cryopreservation.

5.2.4. Cells may be maintained in GP40 or expanded in GP500

5.2.4.1. To maintain in GP40,

5.2.4.1.1. Reseed GP40 flask at ~ $1 \times 10^6$  cells per bioreactor in 30 mLs medium

5.2.4.2. To expand in GP500

5.2.4.2.1. Transfer  $10 \times 10^6$  cells to GP500 bioreactor(s)

5.2.4.2.2. Add medium to 100 mL and culture for ~7 days

5.2.4.2.3. On ~ day 7, count, remove cells if required as in section 5.2.3

5.2.4.2.4. Add 200 mL fresh medium. Return to incubator and culture for 7

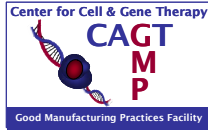

## SOP: D03.01.23 GENERATION OF EBV-TRANSFORMED CELL LINES (LYMPHOBLASTOID CELL LINES - LCL)

*If using a printed copy, insert print date here: \_\_\_\_\_ (on first page only)*

---

days.

5.2.4.2.5. On day 14, count. Expect ~ 800 x 10<sup>6</sup> cells. Remove cells as required, as in section 5.2.3

5.2.4.2.6. Reseed into flasks or bioreactors as required.

**NOTE: Cell numbers used to reseed bioreactors can be increased depending on the timing of the cells required for use as APCs.**

### 5.3. Freezing of LCLs or PBMCs (See Worksheet DW03.01.XB)

5.3.1. Centrifuge cells to be frozen at 400xg for 5 minutes.

5.3.2. Transfer 5 ml of supernatant from centrifuged cells to a 15ml centrifuge tube and store at -80°C for future QC testing. This supernatant can be discarded when all release criteria have been met for this CTL population.

5.3.3. Place cells on ice for 10 minutes to cool.

5.3.4. Resuspend cells in 1 ml freezing medium for each 5-10 x 10<sup>6</sup> cells

5.3.5. Distribute 1ml aliquots of cells/freezing medium mixture into labeled cryotubes.

5.3.6. Place tubes in Nalgene freezing containers and transfer to -80°C freezer and freeze overnight.

5.3.7. Transfer to the designated liquid nitrogen freezer for storage.

## 6. Expected Results

6.1. This procedure should produce a minimum of 2x10<sup>7</sup> LCL for both a back-up freeze and subsequent CTL initiation. Viability should be >75%. The cultures should be capable of growth indefinitely.

## 7. Notes

7.1. Since all cells prepared are intended for infusion to patients, it is essential to adhere to proper procedures to prevent misidentification or contamination of patient samples.

7.2. **ALL** flasks and centrifuge tubes must be labeled with a patient name and number, donor number. **UNLABELED MATERIAL WILL BE DISCARDED.**

7.3. **NEVER** work with more than one patient cell line at any one time.

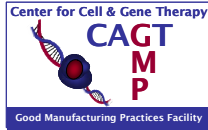

SOP: D03.01.23 GENERATION OF EBV-TRANSFORMED CELL LINES  
(LYMPHOBLASTOID CELL LINES - LCL)

*If using a printed copy, insert print date here: \_\_\_\_\_ (on first page only)*

---

- 7.4. **ALWAYS** use medium prepared and labeled specifically for each patient's cells. **NEVER** use medium prepared for one patient's cells to feed or process cells from a different patient.
8. **References:**
- 8.1. Rooney CM, Smith CA, et al. Use of gene-modified virus-specific T lymphocytes to control Epstein-Barr-virus-related lymphoproliferation, *The Lancet* 1995; 345: 9-13.
9. **Attachments:**
- 9.1. Appendix 1: Flow diagram
- 9.2. Worksheets DW3.6.Xa and DW3.6.Xb (blank and completed versions)

REMAINDER OF PAGE LEFT BLANK INTENTIONALLY

**SOP: D03.01.23 GENERATION OF EBV-TRANSFORMED CELL LINES  
 (LYMPHOBLASTOID CELL LINES - LCL)**

*If using a printed copy, insert print date here: \_\_\_\_\_ (on first page only)*

**APPENDIX 1: FLOW CHART FOR LCL INITIATION/EXPANSION AND MAINTENANCE**

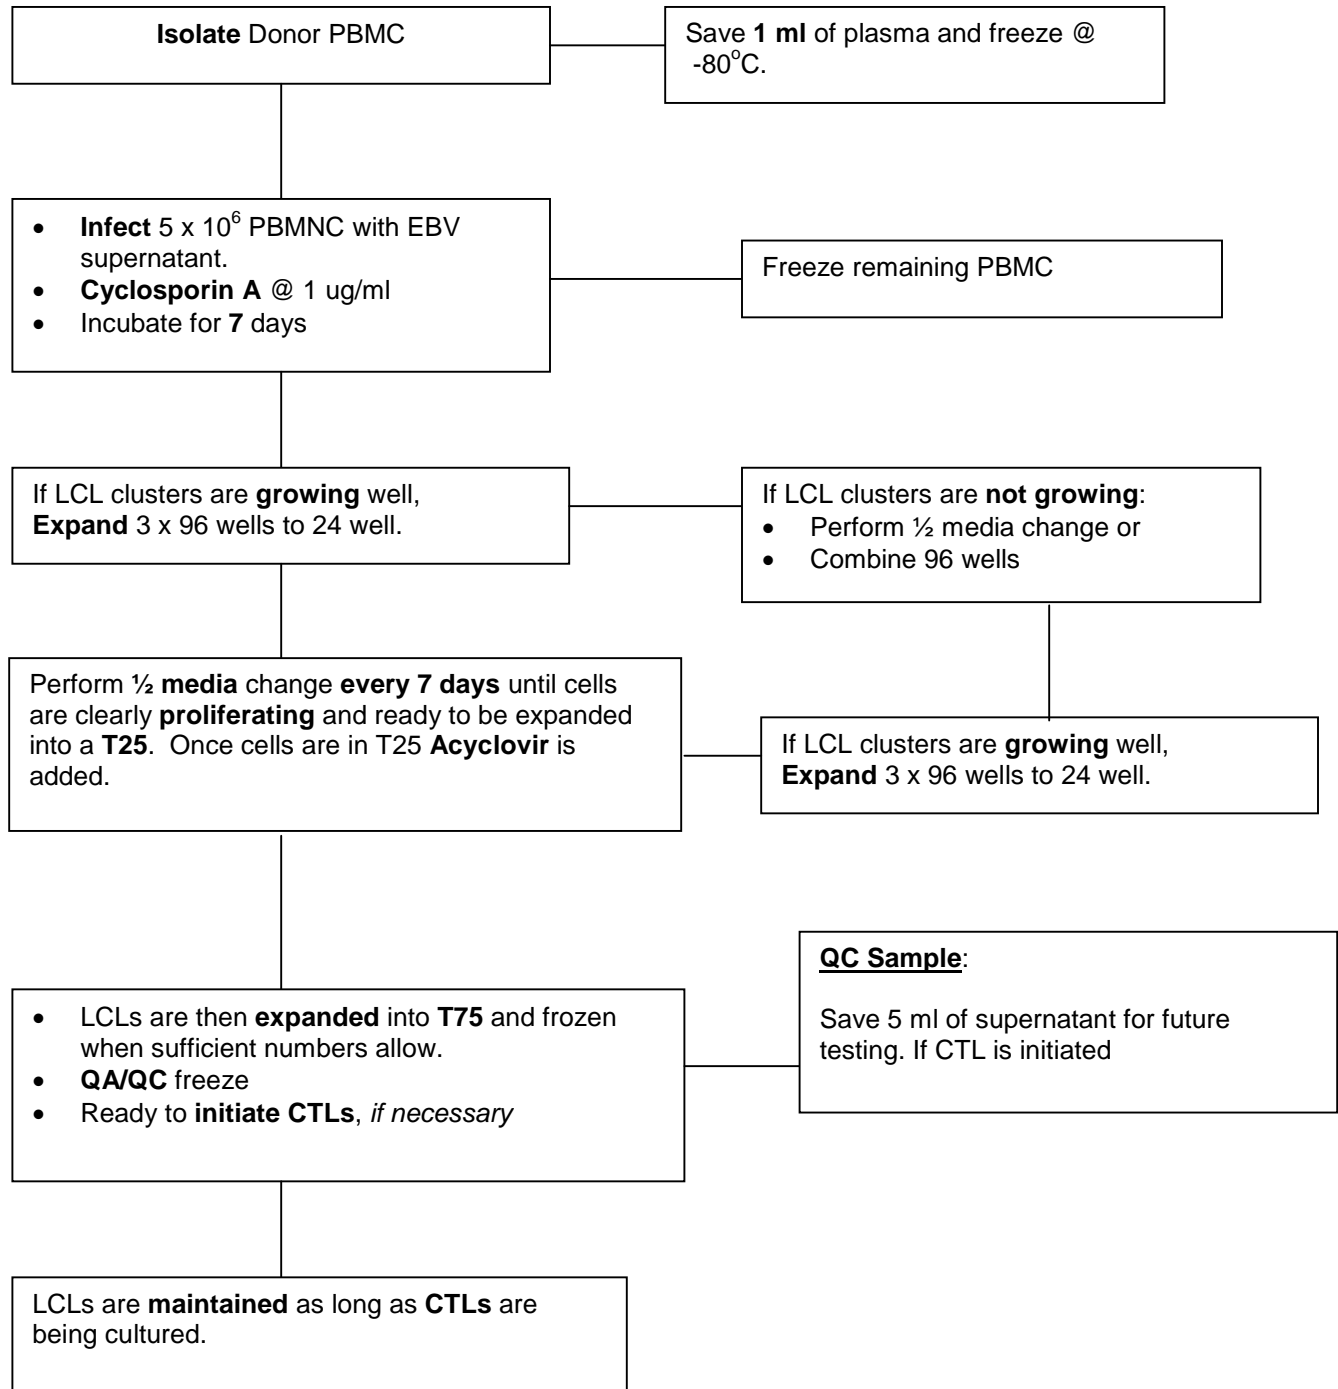

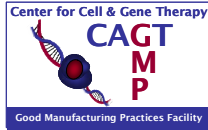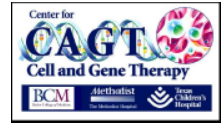

SOP: D03.01.23 GENERATION OF EBV-TRANSFORMED CELL LINES  
(LYMPHOBLASTOID CELL LINES - LCL)

If using a printed copy, insert print date here: \_\_\_\_\_ (on first page only)

10. Review and Revisions

Written by: Cliona Rooney

Reviewed by: Catherine Bollard

Malcolm Brenner  
Laboratory Medical Director

Adrian Gee  
Quality Assurance

Date issued: 05/12/10 Replaces: D03.01.22

In SOPTrak  Training Forms Issued  Hard copy filed & old version archived

**Biennial Review:**

**2012**

Reviewed without changes      Changed and this version archived

Reviewed by: \_\_\_\_\_

QA/QC by: \_\_\_\_\_

Date: \_\_\_\_\_

In SOPTrak  Training Forms Issued  Hard copy filed & old version archived

**2014**

Reviewed without changes      Changed and this version archived

Reviewed by: \_\_\_\_\_

QA/QC by: \_\_\_\_\_

Date: \_\_\_\_\_

In SOPTrak  Training Forms Issued  Hard copy filed & old version archived

**2016**

Reviewed without changes      Changed and this version archived

Reviewed by: \_\_\_\_\_

QA/QC by: \_\_\_\_\_

Date: \_\_\_\_\_

In SOPTrak  Training Forms Issued  Hard copy filed & old version archived
