# Supplementary material
Source: PubMed Central journal article supplement (PMC3705934)
Supplement: NIHMS477993-supplement-SOP3.pdf [file NIHMS477993-supplement-SOP3.pdf]

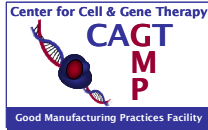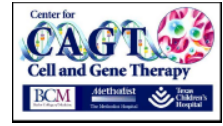

## SOP: D03.14.23 ADENOVIRUS TRANSDUCTION OF B95-8+ LCL FOR CTL STIMULATION

*If using a printed copy, insert print date here: \_\_\_\_\_ (on first page only)*

### 1. Purpose

- 1.1. Epstein-Barr Virus-transformed B cell lines for use as stimulators for cytotoxic T-lymphocytes may be derived from peripheral blood of the stem cell donor or the patient.
- 1.2. B cells are infected by a well-characterized laboratory strain of EBV to generate a lymphoblastoid cell line (LCL).
- 1.3. Antigen can be introduced into the LCL by transduction with adenoviruses.

### 2. Scope

- 2.1. This procedure is to be followed by GMP staff to transduce lymphoblastoid cells to generate clinical grade cytotoxic T cells.

### 3. Definitions and Abbreviations

- |      |            |                                                                               |
|------|------------|-------------------------------------------------------------------------------|
| 3.1. | CTL        | Cytotoxic T- lymphocytes                                                      |
| 3.2. | EBV        | Epstein-Barr Virus                                                            |
| 3.3. | PBMNC      | Peripheral blood mononuclear cells                                            |
| 3.4. | LCL        | Lymphoblastoid Cell Line                                                      |
| 3.5. | B95-8      | A laboratory strain of EBV                                                    |
| 3.6. | HI         | Heat Inactivated                                                              |
| 3.7. | LCL medium | RPMI 1640 containing 10% HI FCS and 2mM L-glutamine and 100 $\mu$ M acyclovir |
| 3.8. | CTL medium | RPMI 1640 45%, Clicks' 45% containing 10% HI FCS and 2mM L-glutamine          |

### 4. Materials and Equipment:

**NOTE: All materials in contact with cells must be sterile, pyrogen-free, stored and used according to the manufacturer's directions unless stored otherwise. Equivalent materials and equipment may be used but all changes must be recorded in the appropriate worksheets.**

#### 4.1. Specimen

- 4.1.1. B95-8+LCL generated according to SOP D03.01.

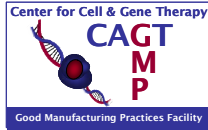

## SOP: D03.14.23 ADENOVIRUS TRANSDUCTION OF B95-8+ LCL FOR CTL STIMULATION

*If using a printed copy, insert print date here: \_\_\_\_\_ (on first page only)*

### 4.2. Materials

|        |                           |                            |
|--------|---------------------------|----------------------------|
| 4.2.1. | RPMI 1640                 | Hyclone                    |
| 4.2.2. | Dulbecco's PBS            | Invitrogen                 |
| 4.2.3. | Fetal Calf Serum          | HyClone                    |
| 4.2.4. | L-glutamine(200 mM)       | Invitrogen                 |
| 4.2.5. | Acyclovir                 | Wellcome                   |
| 4.2.6. | 24-well plate             | Costar                     |
| 4.2.7. | Clinical Grade Adenovirus | Vector Production Facility |
| 4.2.8. | Centrifuge tubes          | Falcon                     |
| 4.2.9. | Serological Pipets        | Falcon                     |

### 4.3. Equipment

- 4.3.1. Biological safety cabinet, certified
- 4.3.2. Centrifuge
- 4.3.3. Incubator
- 4.3.4. Hemacytometer
- 4.3.5. Microscope

## 5. Procedure:

### 5.1. Adenovirus transduction of B95-8+ LCL line

- 5.1.1. Harvest all cells and spin at 400G for 5mins and resuspend in a known volume
- 5.1.2. Perform live cell count using hemacytometer according to SOP E03.11
- 5.1.3. Aliquot up to  $10 \times 10^6$  LCL per 15 ml centrifuge tube or up to  $40 \times 10^6$  in a 50ml tube.
- 5.1.4. Centrifuge @ 400 g at ambient temperature for 5 minutes to pellet cells.
- 5.1.5. Aspirate supernatant.
- 5.1.6. Finger flick tube to disperse cell pellet.

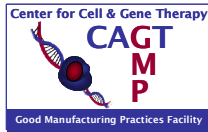

## SOP: D03.14.23 ADENOVIRUS TRANSDUCTION OF B95-8+ LCL FOR CTL STIMULATION

*If using a printed copy, insert print date here: \_\_\_\_\_ (on first page only)*

- 5.1.7. Transfer adenovirus vector into the cells and pipette to mix. The volume to be added depends on the vector being used and will be decided by the protocol PI.
  - 5.1.7.1. For Ad-LMP1-I-LMP2 transduction, use a multiplicity of infection (MOI) of 15,000 viral particles (vp) per cell in 500  $\mu$ l; e.g., If titer of Adenovirus =  $10^{12}$  vp/ml, add 15 $\mu$ l virus/  $1 \times 10^6$  cells.
  - 5.1.7.2. For Ad-CMVpp65 transduction, use an MOI of 100 vp per cell; e.g., If titer of Adenovirus is  $1 \times 10^{12}$  vp/ml, dilute 1:100 and add 10 $\mu$ l of the diluted virus/  $1 \times 10^6$  cells.
- 5.1.8. Loosen cap on centrifuge tube slightly for CO<sub>2</sub> exchange.
- 5.1.9. Incubate for approximately 90 minutes at 37°C/5% CO<sub>2</sub>.
- 5.1.10. After 90 minutes, resuspend cells in complete culture medium to a concentration of  $5 \times 10^5$  cells/ml.
- 5.1.11. Add 2 mls of cell suspension to each well of a 24-well plate.
- 5.1.12. Incubate for 2 days in 37°C, 5% CO<sub>2</sub> incubator.
- 5.1.13. LCL are now ready for use as stimulators.

### 5.2. Preparation of Transduced LCL for CTL stimulation

- 5.2.1. Perform cell count using hemacytometer according to standard operating procedure and calculate number of live cells.
  - 5.2.1.1. If LCL are transduced with the Ad-LMP1-2 vector - send  $2 \times 10^6$  transduced and non-transduced LCL for phenotyping if sufficient cell numbers.
- 5.2.2. Irradiate transduced LCL at 40Gy
- 5.2.3. Wash 3 times after irradiation
  - 5.2.3.1. Centrifuge @ 400 g for 5 minutes
  - 5.2.3.2. Resuspend in 10 mL complete media
- 5.2.4. After 3 washes resuspend LCL in complete media and perform live cell count using hemacytometer according to SOP E03.11

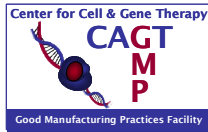

## SOP: D03.14.23 ADENOVIRUS TRANSDUCTION OF B95-8+ LCL FOR CTL STIMULATION

*If using a printed copy, insert print date here: \_\_\_\_\_ (on first page only)*

5.2.5. Centrifuge @ 400 g for 5 minutes, aspirate supernatant and resuspend at  $2.5 \times 10^5$  LCL per ml of CTL medium.

### 5.3. Cryopreservation of remaining CTLs

5.3.1. Centrifuge cells to be frozen at 400 x g for 5 minutes.

5.3.2. Transfer 5 ml of supernatant from centrifuged cells to a 15 ml centrifuge tube and store at  $-80^{\circ}\text{C}$  for future QC testing. This supernatant can be discarded when all release criteria have been met for this CTL population.

5.3.3. Place cell pellet on ice for 10 minutes to cool.

5.3.4. Resuspend cells in freezing medium at no greater than  $10^7$  /ml.

5.3.5. Distribute aliquots of cells/freezing medium mixture into labeled cryotubes.

5.3.6. Place tubes in Nalgene freezing container and transfer to  $-80^{\circ}\text{C}$  freezer and freeze overnight.

5.3.7. Transfer to the designated liquid nitrogen freezer for storage.

### 5.4. Thawing Transduced LCLs for CTL stimulation

5.4.1. Warm media to  $37^{\circ}\text{C}$

5.4.2. Thaw vial(s) of transduced LCL in  $37^{\circ}\text{C}$  waterbath

5.4.3. Add thawed cells to warmed media

5.4.4. Centrifuge at 400 x g for 5 minutes.

5.4.5. Resuspend LCL in complete media or CTL media

5.4.6. Irradiate at 40Gy

5.4.7. Wash LCL twice

5.4.8. Count cells according to SOP E03.11

5.4.9. Centrifuge at 400 X G, aspirate supernatant

5.4.10. Resuspend LCL at  $2.5 \times 10^5$  LCL per ml of CTL medium.

5.4.11. LCL are now ready to stimulate CTLs.

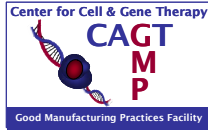

## SOP: D03.14.23 ADENOVIRUS TRANSDUCTION OF B95-8+ LCL FOR CTL STIMULATION

If using a printed copy, insert print date here: \_\_\_\_\_ (on first page only)

### 6. Notes

- 6.1. ALL flasks and centrifuge tubes must be labeled with information to include patient name, patient number and component number. UNLABELED MATERIAL WILL BE DISCARDED.
- 6.2 NEVER work with more than one patient cell line at any one time.
- 6.3 ALWAYS use medium prepared and labeled specifically for each patient's cells. NEVER use medium to feed more than one patient's cells.
- 6.4 Perform all steps in a certified biological safety cabinet, using aseptic technique and following universal precautions.

### 7. Expected Results

- 7.1 Greater than 70% viability of transduced cells for use as antigen-presenting cells

### 8. References

- 8.1 Rooney CM, Smith CA, et al. Use of gene-modified virus-specific T lymphocytes to control Epstein-Barr-virus-related lymphoproliferation, *The Lancet* 1995; 345: 9-13.
- 8.2 Bollard CM, Huls MH, Lacuesta KC, Brenner MK, Rooney CM, Heslop HE. "Generation of autologous LMP2-specific Cytotoxic T cells for patients with relapsed EBV-positive Hodgkin Disease" – *J Immunother.* 2004 Jul-Aug;27(4):317-27
- 8.3 AM Leen, GD Myers, U Sili, MH Huls, H Weiss, KS Leung, G Carrum, RA Krance, JJ Mollidrem, AP Gee, MK Brenner, HE Heslop, CM Rooney, CM Bollard. Monoculture-derived T lymphocytes specific for multiple viruses expand and produce clinically relevant effects in immunocompromised patients. *Nat Med.* 2006 Nov;12(10):1160-1166
- 8.4 CM Bollard, S Gottschalk, AM Leen, H Weiss, KC Straathof, G Carrum, M Khalil, M Wu, MH Huls, CC Chang, MV Gresik, AP Gee, MK Brenner, CM Rooney, HE Heslop. Complete Responses of Relapsed Lymphoma Following Genetic Modification of Tumor-Antigen Presenting Cells and T-lymphocyte transfer. *Blood* 2007 Oct 15;110(8):2838-45.

REMAINDER OF PAGE LEFT BLANK INTENTIONALLY

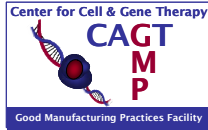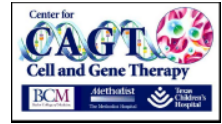

## SOP: D03.14.23 ADENOVIRUS TRANSDUCTION OF B95-8+ LCL FOR CTL STIMULATION

If using a printed copy, insert print date here: \_\_\_\_\_ (on first page only)

### 9. Review and Revisions

Written by: Cliona Rooney

Reviewed by: Catherine Bollard

Helen Heslop  
Laboratory Medical Director

Adrian Gee  
Quality Assurance

Date issued: 07/05/11 Replaces: SOP # D03.14.22

In SOPTrak  Training Forms Issued  Hard copy filed & old version archived

#### Biennial Review

##### 2013

Reviewed without changes      Changed and this version archived

Reviewed by: \_\_\_\_\_

QA/QC by: \_\_\_\_\_

Date: \_\_\_\_\_

In SOPTrak  Training Forms Issued  Hard copy filed & old version archived

##### 2015

Reviewed without changes      Changed and this version archived

Reviewed by: \_\_\_\_\_

QA/QC by: \_\_\_\_\_

Date: \_\_\_\_\_

In SOPTrak  Training Forms Issued  Hard copy filed & old version archived

##### 2017

Reviewed without changes      Changed and this version archived

Reviewed by: \_\_\_\_\_

QA/QC by: \_\_\_\_\_

Date: \_\_\_\_\_

In SOPTrak  Training Forms Issued  Hard copy filed & old version archived
